# Supplementary material for: Coordinated repression and activation of two transcriptional programs stabilizes cell fate during myogenesis
Source: Oxford University Press journal article supplement (doi:10.1242/dev.101956), 2014-06-24
Supplement: dev101956_supp.pdf [file dev101956_supp.pdf]

**Figure S1. Endogenous *ttk* transcripts are stably expressed in the developing visceral mesoderm**

Double *in situ* hybridization against *ttk* (green) and *Mef2* (red). DAPI was used to stain nuclei (blue). (A-A'') Co-expression of *ttk* and *Mef2* at early stage 11 in the visceral mesoderm primordium (arrows). *ttk* is also expressed in tracheal placodes (arrowheads). (B-B'') *ttk* and *Mef2* continue to co-localize in the visceral muscle at stage 15 (arrows). (C-C'') Stage 11 *ttk*-VME transgenic embryo stained by *in situ* hybridization against *GFP* (green), *lmd* (red) and *duf* (blue). Arrows point to a *duf*-positive FC that is negative for *lmd* (marker of FCM) and *GFP*. (D) Schematic representation of the 8 different mRNA isoforms arising from the *ttk* locus. Regions that were used to generate protein isoform specific *in situ* probes against *ttk69* and *ttk88* are indicated in red and green, respectively. (E-E'') Triple fluorescent *in situ* hybridization against *ttk69*, *ttk88* and *Mef2* (mesodermal marker). In (E''), merge between all three probes is shown, highlighting their co-localization in the visceral mesoderm (arrow) and somatic muscle primordia.

**Figure S2. Neuronal marker 22C10 labels all muscle types in *ttk* mutants**

Fluorescent immunostain with the antibodies 22C10 (anti-Futsch, green) and anti-Mef2 (magenta). Futsch and Mef2 are co-expressed in the somatic (A), visceral (A'), and cardiac (A'') muscle of stage 13 embryos. Note that Futsch is a cytoplasmic, microtubule-associated protein while Mef2 is located in the nucleus.

**Figure S3. *twist* expression is regulated by Ttk69 activity in the mesoderm**

(A-F') Expression of *twist* (green) was analyzed by fluorescent *in situ* hybridization in wild type embryos and in embryos with ectopic panmesodermal *ttk69* expression (red). During early stages before the onset of ectopic Ttk69 expression (B' and D'), *twist* is strongly expressed in both genotypes (A-D'). At stage 9, when ectopic *ttk69* transcripts accumulate in the mesoderm (F'), expression of *twist* is significantly reduced (F) compared to wild type embryos (E). (G-I') Double immunostain of a *ttk* mutant embryo with a Twi-specific antibody (red) and an antibody directed against  $\beta$ 3-tubulin (green). In wild type embryos (G and G'), there are six adult muscle precursor cells expressing Twi in each hemisegment (arrows). In *ttk* loss-of-function mutant background, of which two representative embryos are shown (H and H', I and I') there are often more than 6 Twi-positive cells observed (arrows). Note that the relative position of the cells within the hemisegment is also affected. (J) Ttk69 (purple) binding signal (normalized log<sub>2</sub> ChIP-on-chip signal (IP/mock)) in the *twist* locus. In orange are previously identified mesodermal CRMs.

**Figure S4. Expression of the muscle identity gene *Kr* in *ttk* mutant embryos**

Expression pattern of *Kr* was visualized by immunostain with anti-Kr antibody (shown in gray and red) in combination with an antibody against  $\beta$ 3-tubulin (green), labeling all muscle cells. (A-D) At stage 12, before the onset of myoblast fusion, the number of *Kr*-positive cells is similar in wild type (A and B) and *ttk* mutant (C and D) embryos. (E-H) At stage 15, when myoblast fusion is almost finished, there is a decrease in the number of cells expressing *Kr* in *ttk* mutant embryos (G and H) compared to wild type embryos (E and F). (I) Quantification of the number of *Kr*-expressing nuclei: while in stage 15 wild type embryos (gray) there are 18 to 21 *Kr*-positive cells in each region (dorsal, lateral and ventral), in *ttk* mutant embryos (red) the number decreases to 9 to 12 cells. For each genotype, average value of *Kr* and  $\beta$ 3-tubulin positive cells in 20 hemisegments in at least five different embryos is shown. The error bars indicate standard deviation.

**Figure S5 (part 3). Ttk69 binding in the loci of its known targets**

Normalized Ttk69 ChIP-on-chip signal in the vicinity of genes previously associated with Ttk69 activity at different stages of *Drosophila* development: *stg* (A), *dap* (B), *rap* (C), and

*ci* (**D**) in the oocyte; *ftz* (**E**), *eve* (**F**), *tll* (**G**), *run* (**H**), *h* (**I**), *odd* (**J**) in the syncytial blastoderm; *esg* (**K**), *mmy* (**L**), *pyd* (**M**), *bnl* (**N**), *scrt* (**O**), *repo* (**P**), *dpn* (**Q**), *futsch* (**R**) in the embryo; *ase* (**S**) and *CycE* (**T**) in the embryo and larva; and *ac* (**U**), *sc* (**V**), and *lz* (**W**) in the larva. Note that only two genes (*repo* and *mmy*) lack significant Ttk69 binding in their proximity, with *mmy* being just below our stringent cut-off. Previously identified mesodermal CRMs (Zinzen et al., 2009) are indicated in orange.

### Figure S6. De novo motif discovery within Ttk69-bound ChIP peaks

Position Weight Matrices (PWMs) reported by XXmotif with an E-value  $\leq 1e-3$  and matching at least 5% of the input sequence are shown in the left column (individual XXmotif reported E-value is indicated below each sequence logo). The TOMTOM tool (Balagopalan et al., 2001) was used to systematically match discovered motifs to known *Drosophila melanogaster* PWM databases. Motif matches with q-value  $\leq 0.05$  (with the exception of Nau with q-value 0.06) are listed in the right column. Ttk was identified (first row) together with Nau, and additional factors with very repetitive motifs, such as Trl, Aef1 and Jim.

### Figure S7 (part 2). Lmd binding in the loci of its known targets

Overview of Lmd binding in the loci of previously identified Lmd responsive genes (Cunha et al., 2010): *sns* (**A**), *ttk* (**B**), *blow* (**C**), *Act57B* (**D**), *ⓂTub60D* (**E**), *sug* (**F**), *CG14687* (**G**), *CG5080* (**H**), *Tret1-1* (*CG30035*) (**I**), and *CG9416* (**J**). Previously identified mesodermal CRMs (Zinzen et al., 2009) are indicated in orange. In gray (**B**) is the *ttk*-VME enhancer driving expression in visceral and somatic mesoderm (Jakobsen et al., 2007).

### Figure S8. Differential chromatin state at Ttk69 and Lmd-bound regions

The distribution of the quantitative ChIP-Seq signal for three chromatin modifications is shown across bound regions in the vicinity of FC or FCM genes. Spatial distribution of mesoderm-specific signal for the H3 modifications K4me1, K27ac, and K27me3 at 6-8 hrs on enhancers (**A**) and their closest TSS (**B**). X-axes indicate distance from CRM centre (**A**) or from the TSS (**B**), y-axes show background subtracted signal. Shaded areas indicate the 95% confidence intervals of the signal. Note that H3K27ac, a chromatin modification associated with activation, is highly enriched at both Lmd bound CRMs and associated TSS. H3K27me3, a chromatin modification associated with Polycomb mediated repression, is not enriched in any class, indicating that Polycomb is not associated with Ttk mediated repression.

### Figure S9. Activity of the *jumu* enhancer in wild type and *ttk* mutant embryos

(**A-B'**) Expression of the gene *jumu* (gray, green) partially overlaps *duf* (magenta), a marker of all founder cells. **B** and **B'** are high magnification images of the embryo in **A** and **A'**. The embryo is orientated in lateral view. Arrows point to founder cells. (**C-H'**) Fluorescent *in situ* hybridization against *lacZ* (gray, green) driven by a Ttk-bound region in the intron of the *jumu* gene and *Mef2* (magenta), a marker of mesoderm and muscle derivatives, in wild type (**C, C', E, E', G, G'**) and *ttk<sup>D2-50</sup>* homozygous mutant (**D, D', F, F', H, H'**) embryos. At stage 6, *jumu-lacZ* is transiently active in the mesoderm (arrow) of both wild type (**C, C'**) and *ttk* mutant (**D, D'**) embryos. At stage 14, *jumu-lacZ* is derepressed in multiple cell types of *ttk*deficient embryos, including the ventral (**F, F'**) and dorsal (**H, H'**) ectoderm (arrowheads). (**C** and **D**) are ventrolateral views, (**E** and **F**) are ventral views, and (**G** and **H**) dorsal views. All embryos are orientated with anterior to the left.

### Figure S10. Expression of *CG4238* in wild type and *ttk* mutant embryos

A probe against *CG4238* was used to visualize its embryonic expression pattern (gray, green), in combination with a general mesodermal marker *Mef2* (magenta). (**A-B'**) In both

wild type and *ttk* mutant embryos at stage 8, *CG4238* is expressed only in the germ cells (arrowheads). **(C-D')** At stage 11, *CG4238* continues to be expressed in germ cells and in *ttk* mutant embryos, it starts to be expressed in the salivary gland as well (arrowheads). **(E-F')** At stage 13, *CG4238* is strongly derepressed in the gut (arrowheads) in *ttk* mutant embryos. **(G-H')** At stage 15, *CG4238* is derepressed in a subset of somatic mesoderm (arrows) and ectoderm (arrowheads) in *ttk* mutant embryos. In wild type embryos, *CG4238* continues to be expressed only in the germ cells. All embryos are lateral views, oriented with anterior to the left and dorsal to the top with the exception of embryos in **E** and **F**, which are shown in dorsolateral views.

Figure S1

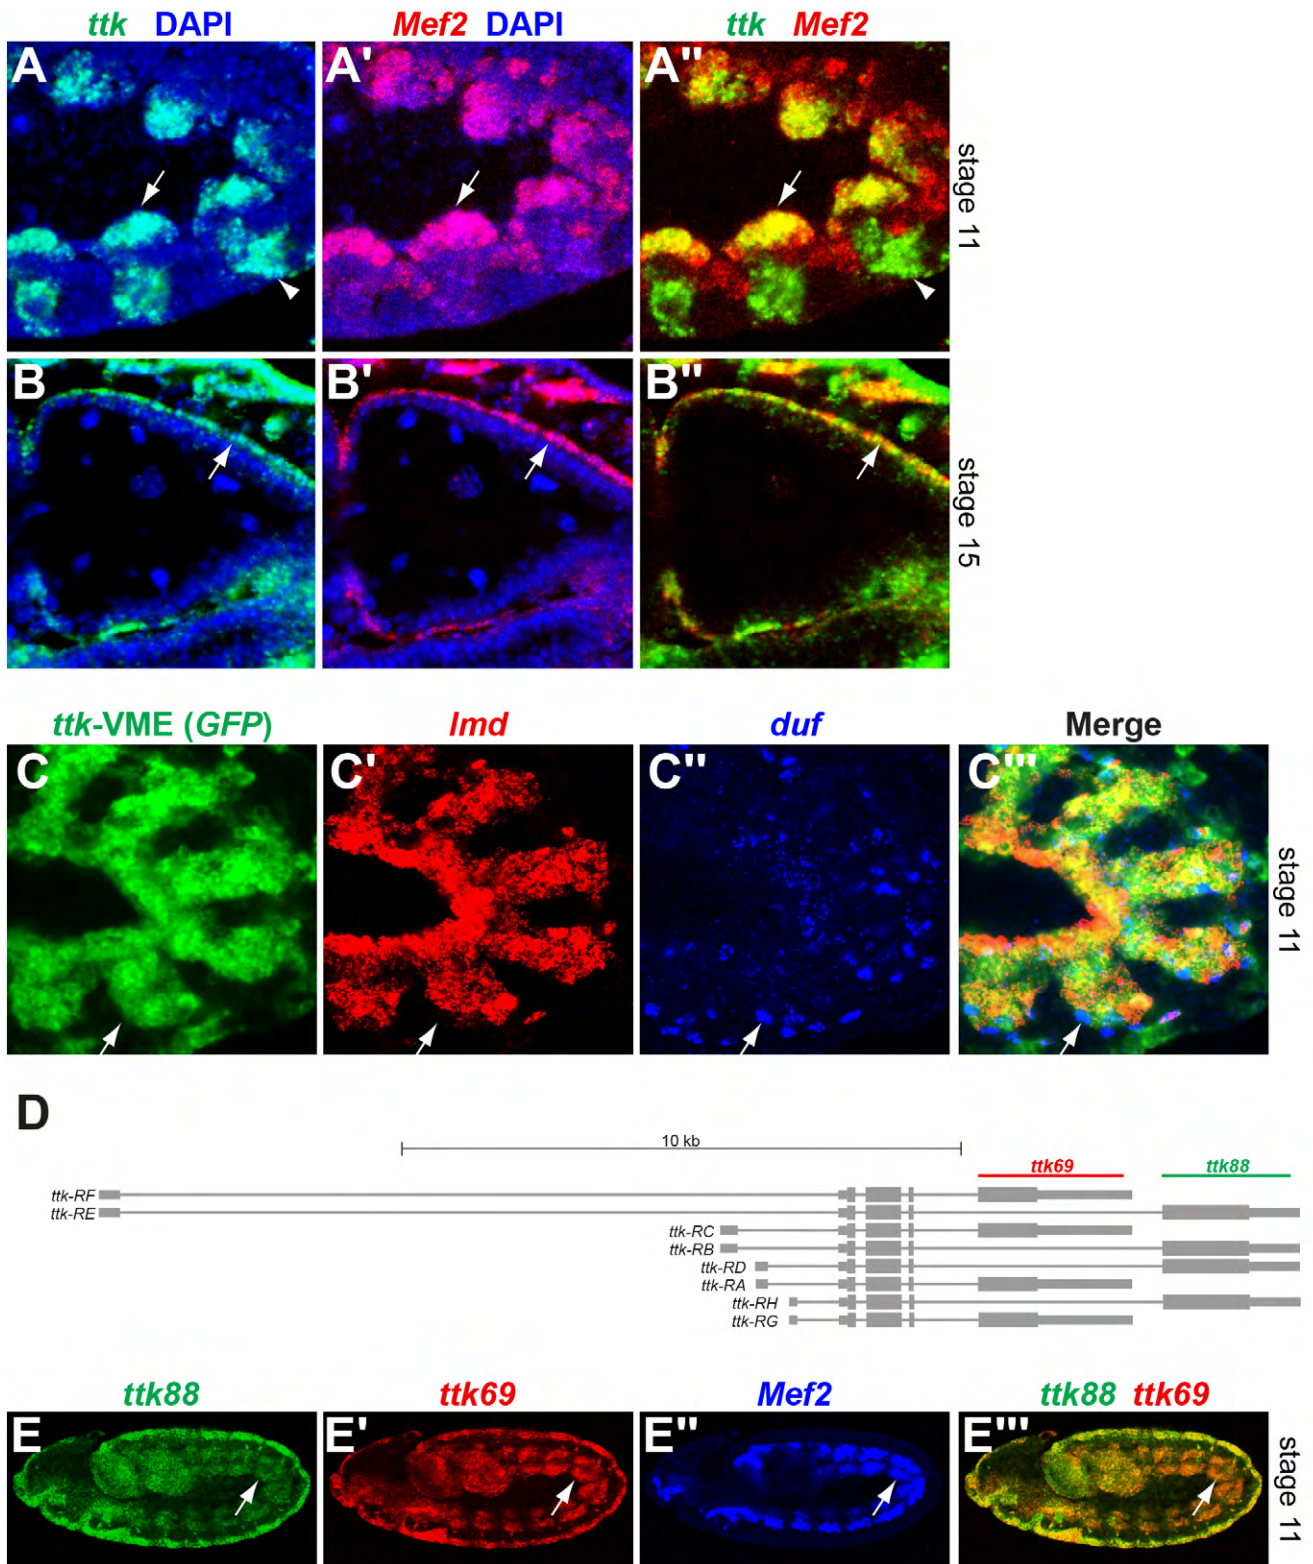

Figure S2

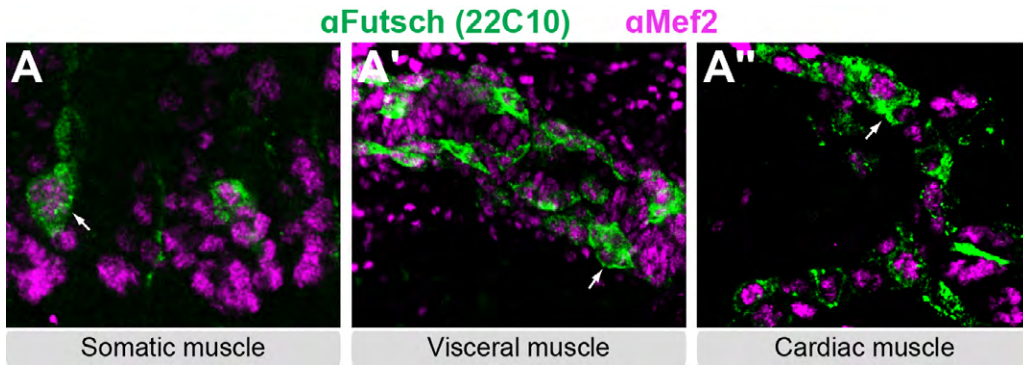

Figure S3

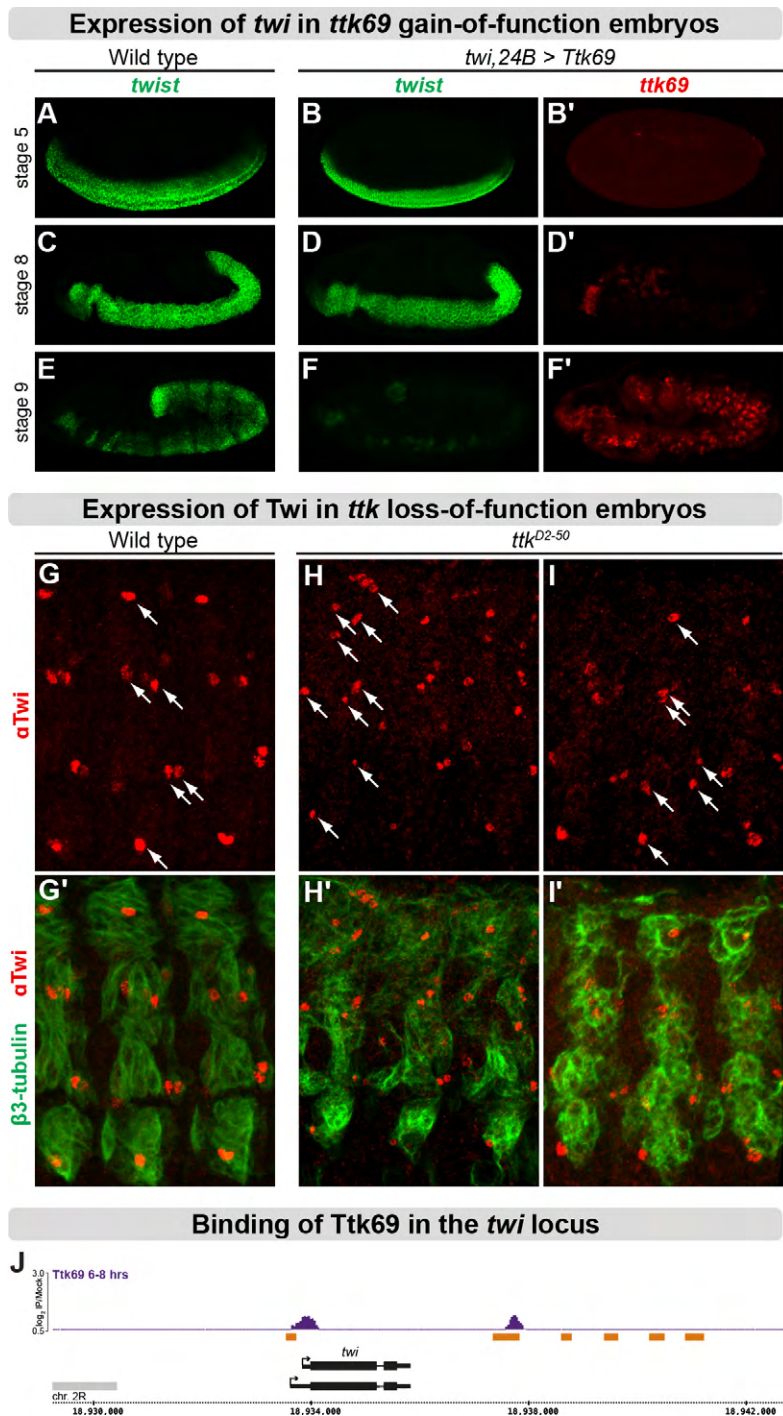

Figure S4

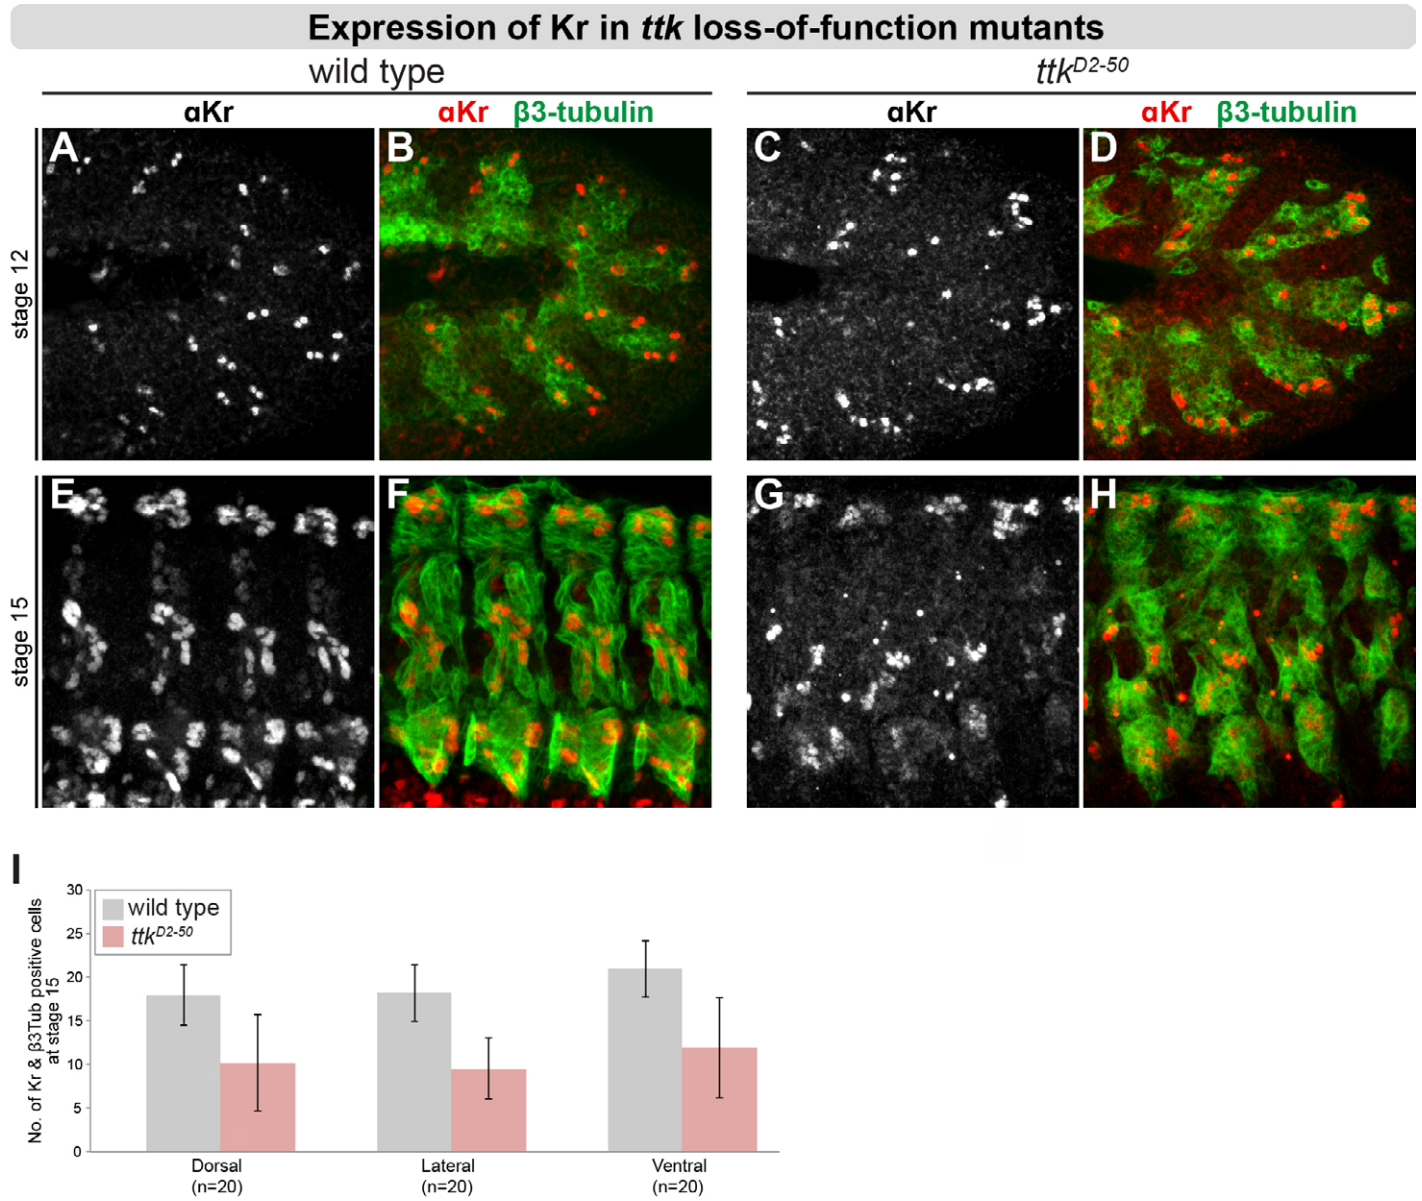

Figure S5

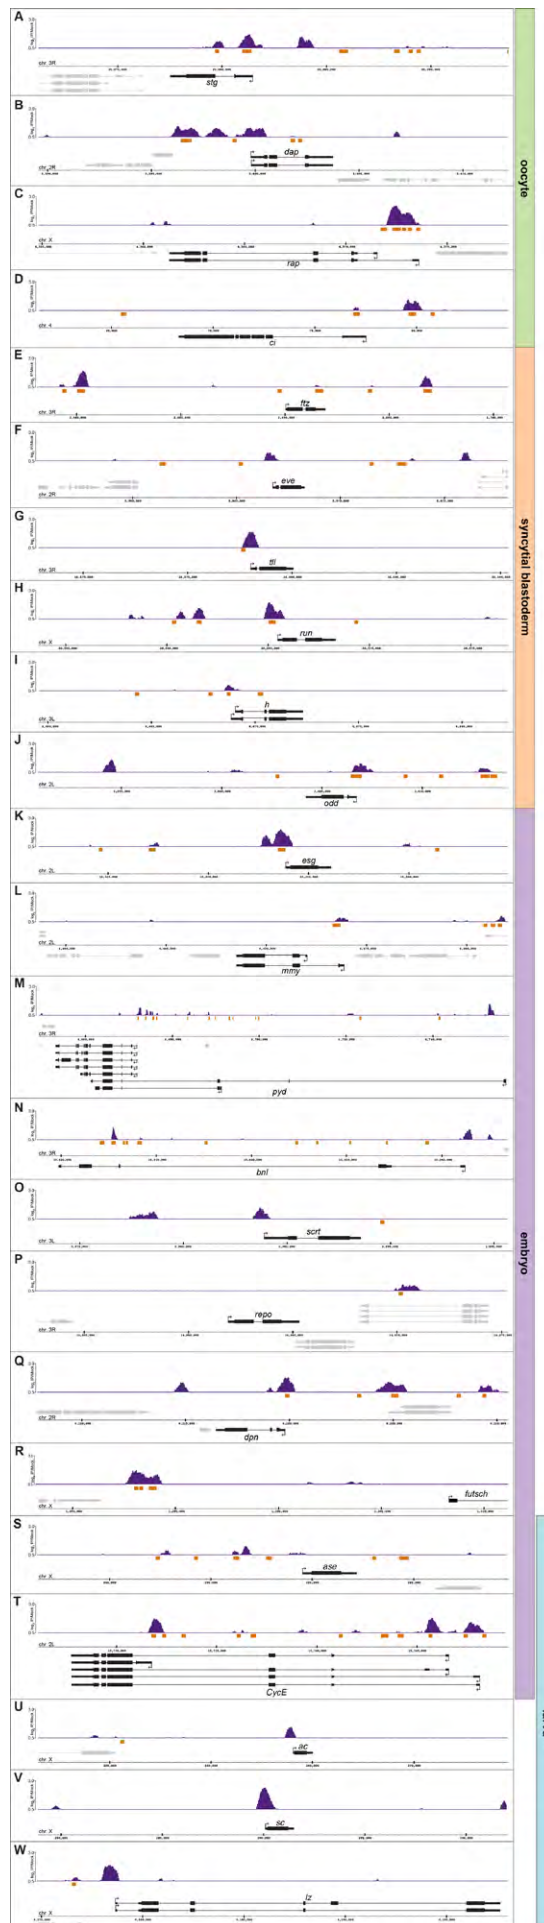

Figure S6

| Discovered PWMs<br>(XXmotif)                                                                                 | Identified PWM<br>(TOMTOM)                                                                                                     |
|--------------------------------------------------------------------------------------------------------------|--------------------------------------------------------------------------------------------------------------------------------|
|  <p>E-value=3.61e-11</p>    |  <p><b>Ttk</b> (TOMTOM q-value=0.0012)</p>   |
|  <p>E-value=2.00e-222</p>   |  <p><b>Trl</b> (TOMTOM q-value=0.02)</p>     |
|  <p>E-value=3.37e-69</p>    |  <p><b>Aef1</b> (TOMTOM q-value=6.9e-05)</p> |
|  <p>E-value=2.40e-07</p>    |  <p><b>jim</b> (TOMTOM q-value=0.005)</p>    |
|  <p>E-value=2.80e-06</p>   |  <p><b>nau</b> (TOMTOM q-value=0.06)</p>    |
|  <p>E-value=3.75e-132</p> | <p>No Match</p>                                                                                                                |
|  <p>E-value=1.12e-26</p>  | <p>No Match</p>                                                                                                                |
|  <p>E-value= 3.57e-05</p> | <p>No Match</p>                                                                                                                |



Figure S7

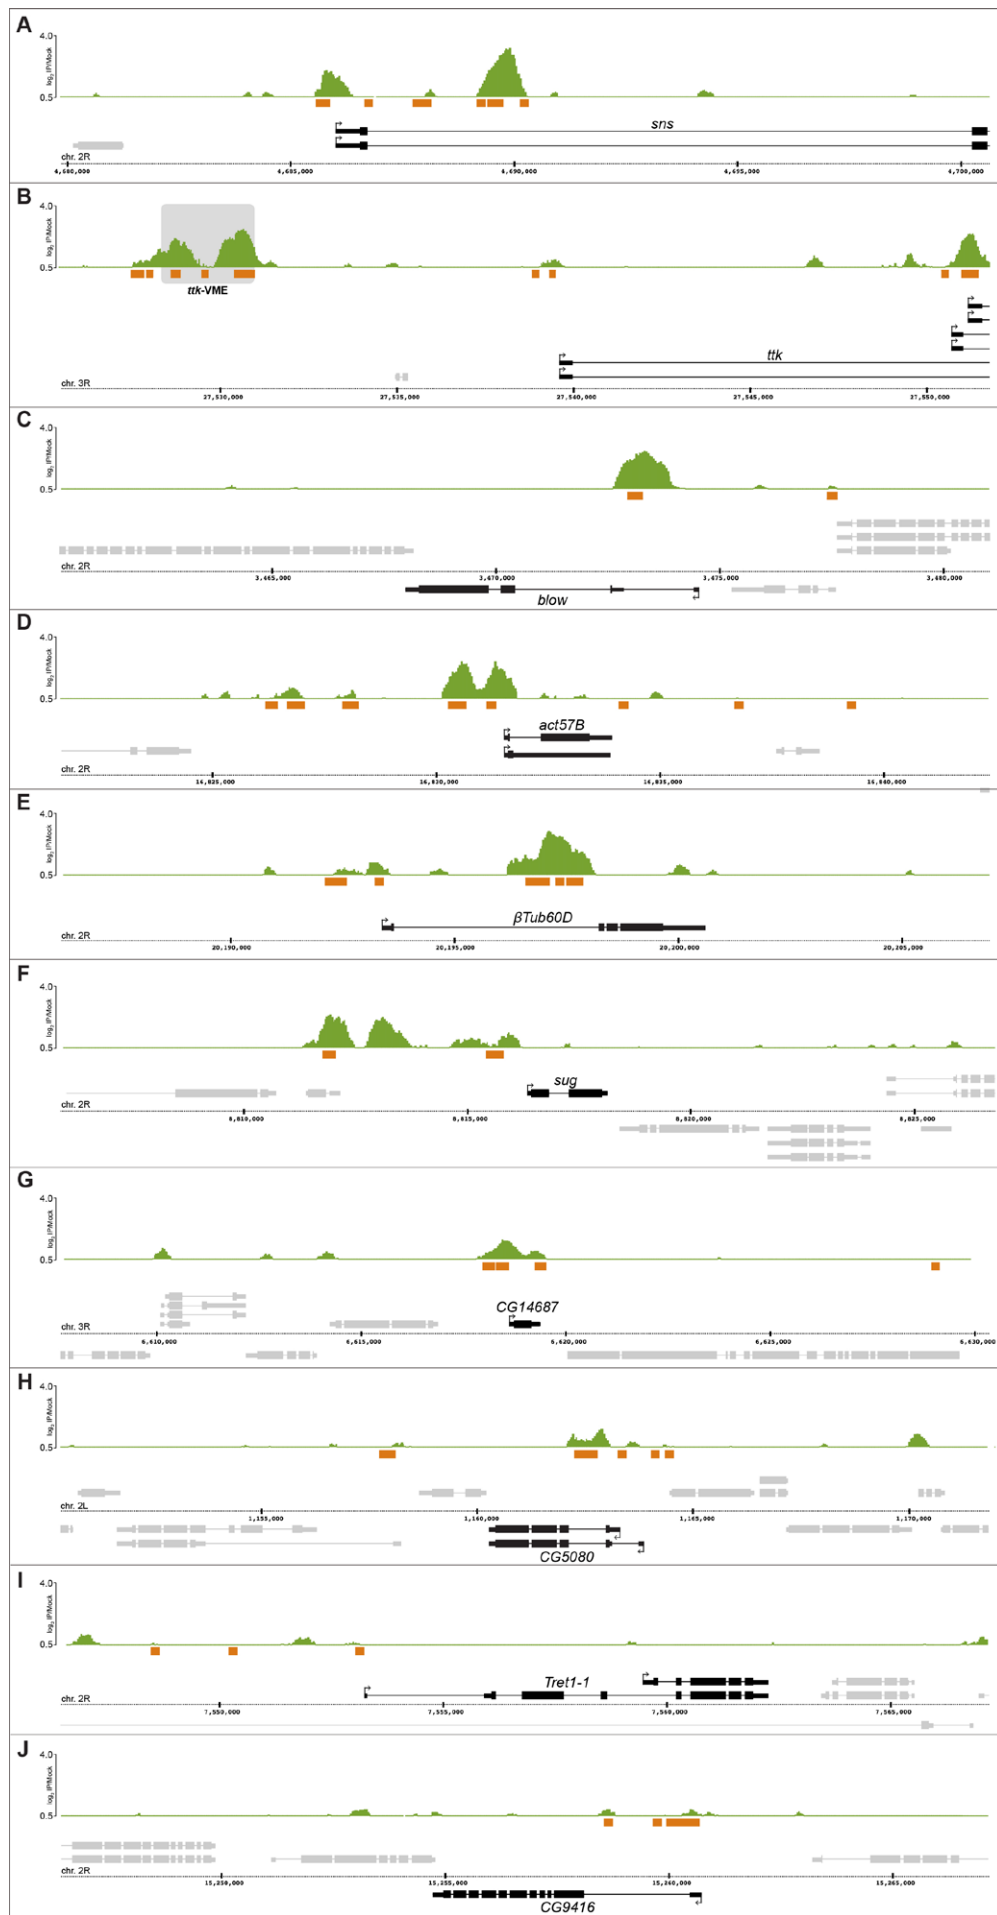

Figure S8

**A**

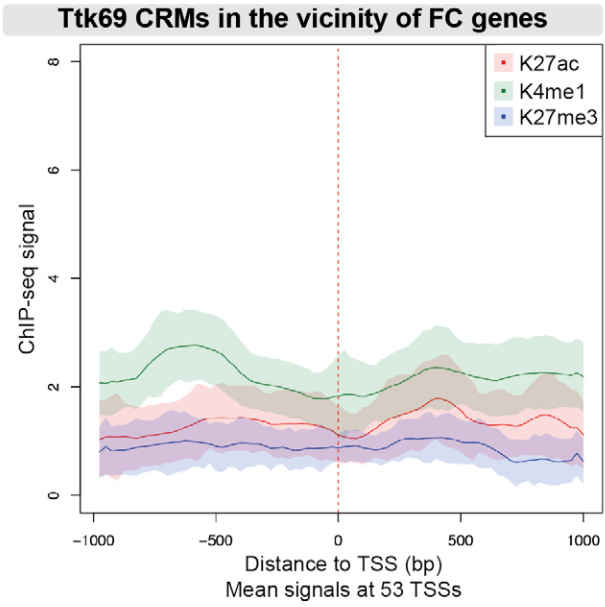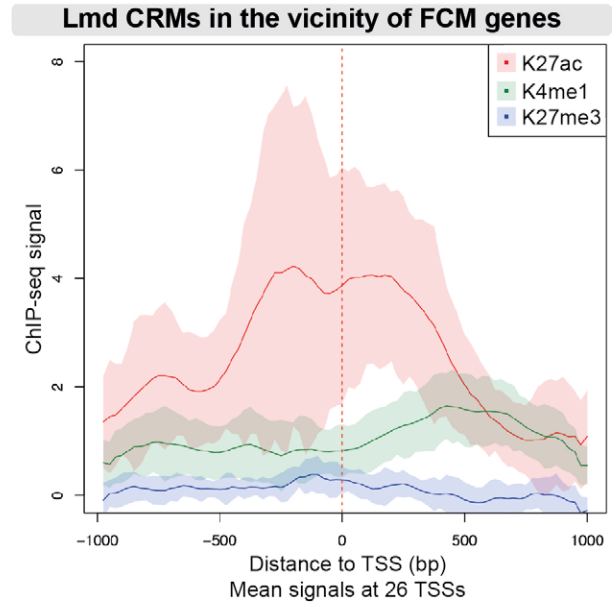

**B**

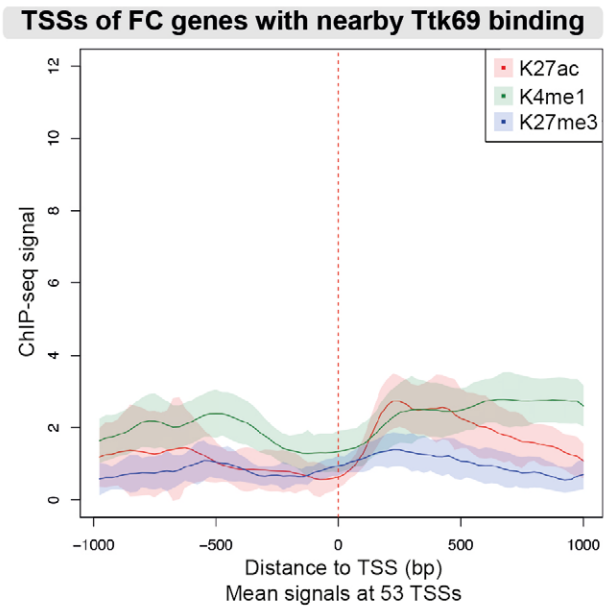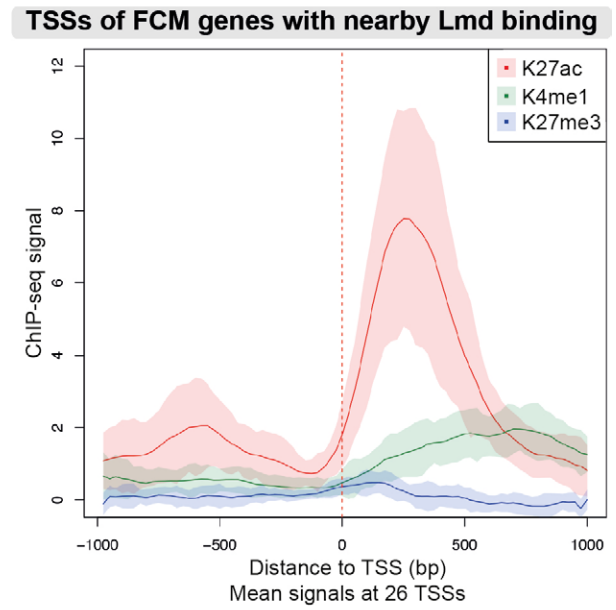

Figure S9

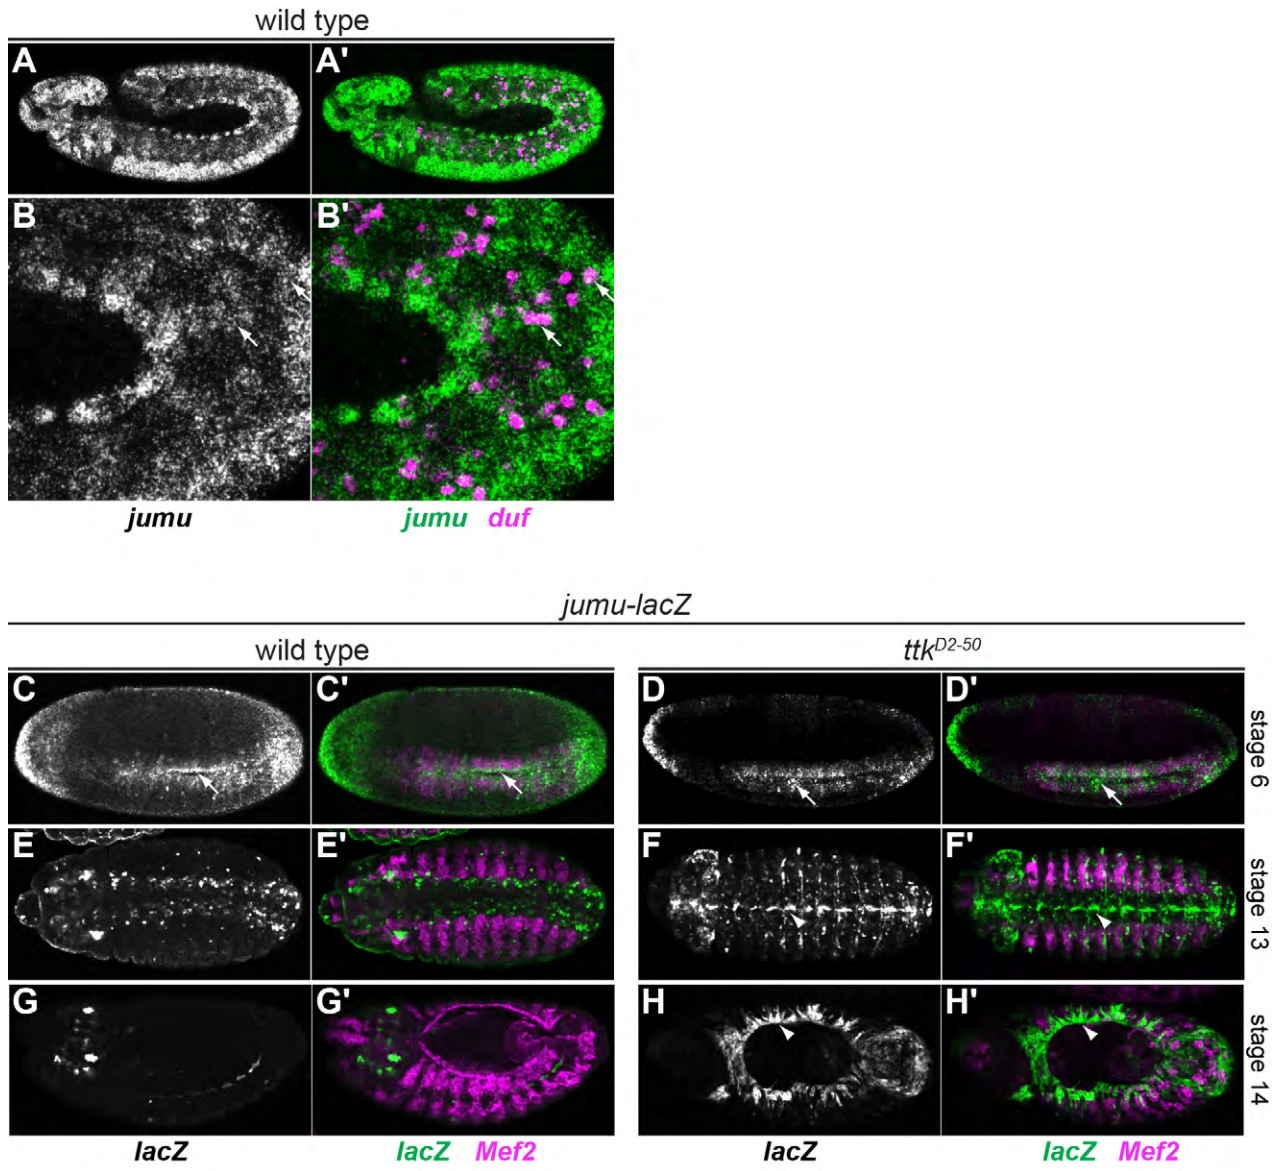

Figure S10

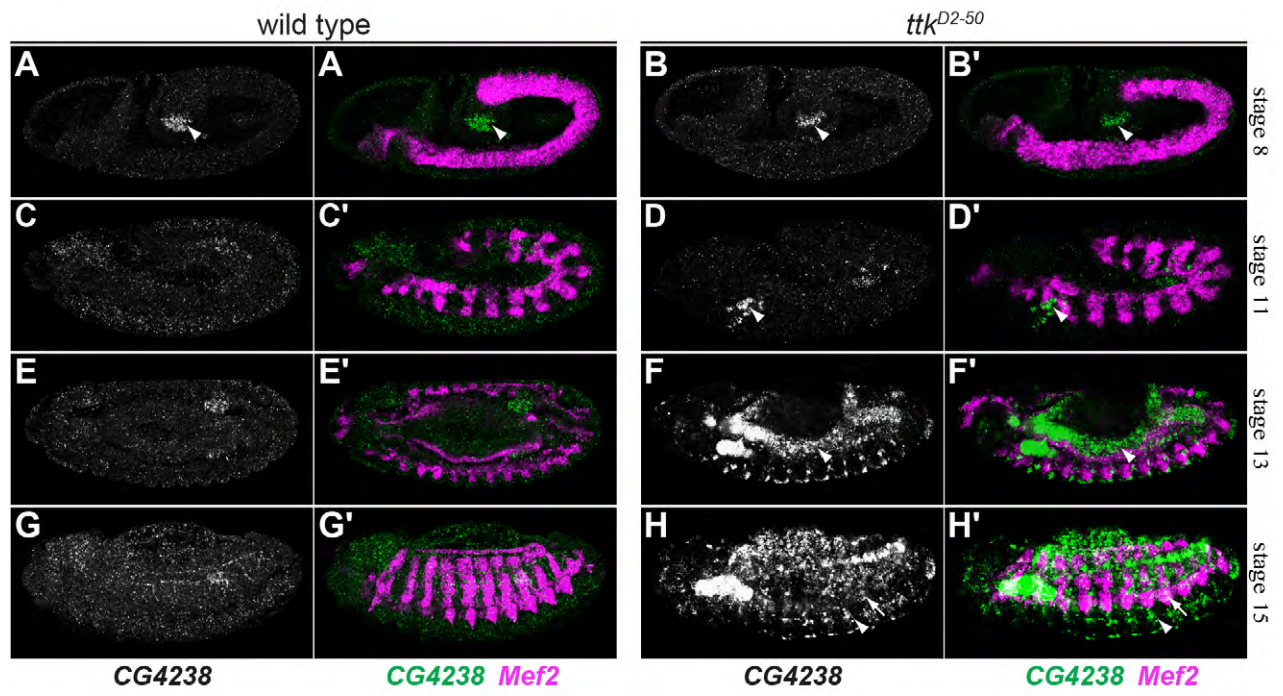

[Download Table S1](#)

[Download Table S2](#)

[Download Table S3](#)

**Table S4: Genes with Ttk69 and Lmd co-bound CRM(s) in their vicinity**

| Expressed in mesoderm | Expressed outside of mesoderm | Ubiquitously expressed |
|-----------------------|-------------------------------|------------------------|
| FBgn0000014           | FBgn0000363                   | FBgn0000157            |
| FBgn0000044           | FBgn0000459                   | FBgn0000448            |
| FBgn0000492           | FBgn0001168                   | FBgn0000568            |
| FBgn0000721           | FBgn0001257                   | FBgn0000591            |
| FBgn0001186           | FBgn0003388                   | FBgn0001139            |
| FBgn0001235           | FBgn0003396                   | FBgn0002633            |
| FBgn0002733           | FBgn0003460                   | FBgn0002945            |
| FBgn0002734           | FBgn0003513                   | FBgn0003200            |
| FBgn0002735           | FBgn0003896                   | FBgn0003261            |
| FBgn0003285           | FBgn0004102                   | FBgn0003345            |
| FBgn0003432           | FBgn0004666                   | FBgn0004198            |
| FBgn0003448           | FBgn0010611                   | FBgn0004859            |
| FBgn0003502           | FBgn0011766                   | FBgn0005630            |
| FBgn0003721           | FBgn0026058                   | FBgn0010323            |
| FBgn0003862           | FBgn0028425                   | FBgn0015024            |
| FBgn0004368           | FBgn0052767                   | FBgn0015778            |
| FBgn0005511           | FBgn0030628                   | FBgn0016977            |
| FBgn0005771           | FBgn0030970                   | FBgn0020307            |
| FBgn0010100           | FBgn0033075                   | FBgn0020386            |
| FBgn0010300           | FBgn0033939                   | FBgn0024308            |
| FBgn0010470           | FBgn0036494                   | FBgn0026533            |
| FBgn0011286           | FBgn0036732                   | FBgn0027108            |
| FBgn0011656           | FBgn0039905                   | FBgn0028953            |
| FBgn0011763           | FBgn0040318                   | FBgn0031098            |
| FBgn0013263           | FBgn0052711                   | FBgn0031376            |
| FBgn0014011           | FBgn0052772                   | FBgn0031395            |
| FBgn0015371           |                               | FBgn0033636            |
| FBgn0015513           |                               | FBgn0034476            |
| FBgn0016694           |                               | FBgn0035397            |
| FBgn0017397           |                               | FBgn0037293            |
| FBgn0020257           |                               |                        |
| FBgn0020513           |                               |                        |
| FBgn0024244           |                               |                        |
| FBgn0024555           |                               |                        |
| FBgn0029003           |                               |                        |
| FBgn0029903           |                               |                        |
| FBgn0029927           |                               |                        |
| FBgn0029939           |                               |                        |
| FBgn0029970           |                               |                        |
| FBgn0031516           |                               |                        |
| FBgn0031895           |                               |                        |
| FBgn0032078           |                               |                        |
| FBgn0032815           |                               |                        |
| FBgn0034087           |                               |                        |
| FBgn0036030           |                               |                        |
| FBgn0036449           |                               |                        |
| FBgn0036555           |                               |                        |
| FBgn0036921           |                               |                        |
| FBgn0036945           |                               |                        |
| FBgn0037471           |                               |                        |

|             |
|-------------|
| FBgn0037635 |
| FBgn0037960 |
| FBgn0040108 |
| FBgn0042650 |
| FBgn0050115 |
| FBgn0052813 |

**Table S5: Binding of Ttk69 and Lmd in the vicinity of genes expressed in FCs, FCMs or both cell types**

"+" or "-" meso indicates overlap with a CRM bound by 5 key mesodermal TFs (Zinzen et al., 2009)

| Genes with Ttk69-only bound CRM(s) within 1.5kB from TSS |             |             |             |             |             | Genes with Lmd-only bound CRM(s) within 1.5kB from TSS |             |             |             |             |             |
|----------------------------------------------------------|-------------|-------------|-------------|-------------|-------------|--------------------------------------------------------|-------------|-------------|-------------|-------------|-------------|
| FC+meso                                                  | FC-meso     | FCM+meso    | FCM-meso    | FC&FCM+meso | FC&FCM-meso | FC+meso                                                | FC-meso     | FCM+meso    | FCM-meso    | FC&FCM+meso | FC&FCM-meso |
| FBgn0000097                                              | FBgn0000180 | FBgn0029082 | FBgn0029504 | FBgn0004907 | FBgn0040395 | FBgn0003285                                            | FBgn0003175 | FBgn0001142 | FBgn0003076 | FBgn0003285 | FBgn0023023 |
| FBgn0000099                                              | FBgn0000606 |             |             | FBgn0041145 | FBgn0011656 | FBgn0011571                                            | FBgn0034657 | FBgn0004133 | FBgn0004919 | FBgn0022959 | FBgn0023081 |
| FBgn0001180                                              | FBgn0008651 |             |             | FBgn0000472 |             | FBgn0011592                                            | FBgn0035036 | FBgn0005427 | FBgn0020766 | FBgn0030061 | FBgn0037843 |
| FBgn0001316                                              | FBgn0010341 |             |             |             |             | FBgn0011817                                            | FBgn0037066 | FBgn0008649 | FBgn0029148 | FBgn0030771 |             |
| FBgn0001319                                              | FBgn0025641 |             |             |             |             | FBgn0020299                                            | FBgn0039187 | FBgn0010812 | FBgn0035464 | FBgn0033917 |             |
| FBgn0001325                                              | FBgn0036494 |             |             |             |             | FBgn0034802                                            |             | FBgn0017565 | FBgn0036663 |             |             |
| FBgn0001981                                              | FBgn0036565 |             |             |             |             | FBgn0038071                                            |             | FBgn0022960 | FBgn0036762 |             |             |
| FBgn0002561                                              |             |             |             |             |             | FBgn0041096                                            |             | FBgn0024238 | FBgn0038369 |             |             |
| FBgn0003124                                              |             |             |             |             |             | FBgn0050122                                            |             | FBgn0024556 | FBgn0038381 |             |             |
| FBgn0003254                                              |             |             |             |             |             |                                                        |             | FBgn0028980 | FBgn0052066 |             |             |
| FBgn0003300                                              |             |             |             |             |             |                                                        |             | FBgn0033310 |             |             |             |
| FBgn0003430                                              |             |             |             |             |             |                                                        |             | FBgn0033782 |             |             |             |
| FBgn0003862                                              |             |             |             |             |             |                                                        |             | FBgn0034089 |             |             |             |
| FBgn0004177                                              |             |             |             |             |             |                                                        |             | FBgn0037439 |             |             |             |
| FBgn0004373                                              |             |             |             |             |             |                                                        |             | FBgn0037835 |             |             |             |
| FBgn0004449                                              |             |             |             |             |             |                                                        |             | FBgn0037848 |             |             |             |
| FBgn0004569                                              |             |             |             |             |             |                                                        |             |             |             |             |             |
| FBgn0004647                                              |             |             |             |             |             |                                                        |             |             |             |             |             |
| FBgn0005630                                              |             |             |             |             |             |                                                        |             |             |             |             |             |
| FBgn0010105                                              |             |             |             |             |             |                                                        |             |             |             |             |             |
| FBgn0010452                                              |             |             |             |             |             |                                                        |             |             |             |             |             |
| FBgn0011278                                              |             |             |             |             |             |                                                        |             |             |             |             |             |
| FBgn0011674                                              |             |             |             |             |             |                                                        |             |             |             |             |             |
| FBgn0013725                                              |             |             |             |             |             |                                                        |             |             |             |             |             |
| FBgn0014143                                              |             |             |             |             |             |                                                        |             |             |             |             |             |
| FBgn0015396                                              |             |             |             |             |             |                                                        |             |             |             |             |             |
| FBgn0015805                                              |             |             |             |             |             |                                                        |             |             |             |             |             |
| FBgn0015907                                              |             |             |             |             |             |                                                        |             |             |             |             |             |
| FBgn0017581                                              |             |             |             |             |             |                                                        |             |             |             |             |             |
| FBgn0020647                                              |             |             |             |             |             |                                                        |             |             |             |             |             |
| FBgn0020912                                              |             |             |             |             |             |                                                        |             |             |             |             |             |
| FBgn0023526                                              |             |             |             |             |             |                                                        |             |             |             |             |             |
| FBgn0026084                                              |             |             |             |             |             |                                                        |             |             |             |             |             |
| FBgn0026319                                              |             |             |             |             |             |                                                        |             |             |             |             |             |
| FBgn0027949                                              |             |             |             |             |             |                                                        |             |             |             |             |             |
| FBgn0028369                                              |             |             |             |             |             |                                                        |             |             |             |             |             |
| FBgn0028978                                              |             |             |             |             |             |                                                        |             |             |             |             |             |
| FBgn0033681                                              |             |             |             |             |             |                                                        |             |             |             |             |             |
| FBgn0034224                                              |             |             |             |             |             |                                                        |             |             |             |             |             |
| FBgn0035128                                              |             |             |             |             |             |                                                        |             |             |             |             |             |
| FBgn0036899                                              |             |             |             |             |             |                                                        |             |             |             |             |             |
| FBgn0037207                                              |             |             |             |             |             |                                                        |             |             |             |             |             |
| FBgn0037760                                              |             |             |             |             |             |                                                        |             |             |             |             |             |
| FBgn0039350                                              |             |             |             |             |             |                                                        |             |             |             |             |             |
| FBgn0051536                                              |             |             |             |             |             |                                                        |             |             |             |             |             |
| FBgn0052560                                              |             |             |             |             |             |                                                        |             |             |             |             |             |
